# Supplementary material
Source: PubMed Central journal article supplement (PMC2756131)
Supplement: blood-2009-02-203547_1.pdf [file blood-2009-02-203547_1.pdf]

**MSP primers**

|                             | Unmethylated sense                | Unmethylated antisense       | Size (bp) | Methylated sense              | Methylated antisense    | Size (bp) | Anneal Temp (C) | Cycles |
|-----------------------------|-----------------------------------|------------------------------|-----------|-------------------------------|-------------------------|-----------|-----------------|--------|
| <b>CDH-1</b>                | TGGTTGATGTTATGTATTTATTTTAGTGGTGTT | ACACCAAATACAATCAAATCAAACCAA  | 120       | TGTAGTTACGTATTTATTTTAGTGGCGTC | CGAATACGATCGAATCGAACCG  | 112       | 58              | 35     |
| <b>p15</b> <sup>INK4B</sup> | GGTTGGTTTTTATTTGTTAGAGTGAGGT      | AACCACTTAACCACAAAATACAACACA  | 80        | GGTTTTTATTTGTTAGAGCGAGGC      | TAACCGCAAAATACGAACGCG   | 68        | 58              | 35     |
| <b>DAPK-1</b>               | GGAGGATAGTTGGATTGAGTTAATGTT       | CAAATCCCTCCCAACACCAA         | 106       | GGATAGTCGGATCGAGTTAACGTC      | CCCTCCCAACGCCGA         | 98        | 58              | 35     |
| <b>SOCS-1</b>               | TTGAGTTGTTGGAGTATTATGTGGTGTT      | CACTAACACACAACCTCTACAACAACCA | 100       | TGTTGGAGTATTACGTGGCGGC        | CGACACAACCTCTACAACGACCG | 88        | 58              | 35     |

**BSS primer**

|                             | Forward primer          | Reverse primer             | Size (bp) |  |  | Anneal Temp (C) | Cycles |
|-----------------------------|-------------------------|----------------------------|-----------|--|--|-----------------|--------|
| <b>p15</b> <sup>INK4B</sup> | TAGGTTTTTGGTTTAGTTGAAAA | CTCCTCCTAAAAAACCTAAACTCAAC | 303       |  |  | 58              | 35     |
