# Supplementary material
Source: PubMed Central journal article supplement (PMC2756131)
Supplement: blood-2009-02-203547_2.pdf [file blood-2009-02-203547_2.pdf]

| Affymetrix ID          | Gene Symbol | Gene Name                                                             | Fold Change |
|------------------------|-------------|-----------------------------------------------------------------------|-------------|
|                        |             | <b>Post Translational Modification</b>                                |             |
| 215577_at              | UBE2E1      | UBIQUITIN-CONJUGATING ENZYME E2E 1 (UBC4/5 HOMOLOG, YEAST)            | -1.6        |
| 203305_at              | F13A1       | COAGULATION FACTOR XIII, A1 POLYPEPTIDE                               | 2.6         |
| 229383_at              | MARCH--1    | MEMBRANE-ASSOCIATED RING FINGER (C3HC4) 1                             | 2.3         |
| 240971_x_at            | CUL4A       | CULLIN 4A                                                             | -2.2        |
| 210635_s_at            | KLHL20      | KELCH-LIKE 20 (DROSOPHILA)                                            | -1.9        |
| 204079_at              | TPST2       | TYROSYLPROTEIN SULFOTRANSFERASE 2                                     | 2           |
|                        |             | <b>Phosphorylation</b>                                                |             |
| 236023_at              | CDK9        | CYCLIN-DEPENDENT KINASE 9 (CDC2-RELATED KINASE)                       | -1.8        |
| 231111_at              | SCYL3       | SCY1-LIKE 3 (S. CEREVISIAE)                                           | 1.6         |
| 212172_at              | AK2         | ADENYLATE KINASE 2                                                    | 2           |
| 243829_at              | BRAF        | V-RAF MURINE SARCOMA VIRAL ONCOGENE HOMOLOG B1                        | -1.6        |
| 1554719_at             | NDUFA10     | NADH DEHYDROGENASE (UBIQUINONE) 1 ALPHA SUBCOMPLEX, 10, 42KDA         | -2.5        |
| 229383_at              | MARCH--1    | MEMBRANE-ASSOCIATED RING FINGER (C3HC4) 1                             | 2.3         |
| 240971_x_at            | CUL4A       | CULLIN 4A                                                             | -2.2        |
|                        |             | <b>Zinc Binding</b>                                                   |             |
| 1569191_at             | ZNF737      | SIMILAR TO ZINC FINGER PROTEIN 93 (ZINC FINGER PROTEIN HTF34)         | 1.8         |
| 229383_at              | MARCH--1    | MEMBRANE-ASSOCIATED RING FINGER (C3HC4) 1                             | 2.3         |
| 236533_at              | DDEF1       | DEVELOPMENT AND DIFFERENTIATION ENHANCING FACTOR 1                    | -1.5        |
| 244640_at              | LOC342892   | HYPOTHETICAL PROTEIN LOC342892                                        | 2.2         |
| 1555392_at             | TES         | TESTIS DERIVED TRANSCRIPT (3 LIM DOMAINS)                             | -1.9        |
|                        |             | <b>Nucleotide Binding</b>                                             |             |
| 212172_at              | AK2         | ADENYLATE KINASE 2                                                    | 2           |
| 222479_s_at            | DYNC1L1     | DYNEIN, CYTOPLASMIC 1, LIGHT INTERMEDIATE CHAIN 1                     | -1.5        |
| 223200_s_at            | LSG1        | LARGE SUBUNIT GTPASE 1 HOMOLOG (S. CEREVISIAE)                        | -1.6        |
|                        |             | <b>Transmembrane</b>                                                  |             |
| 223939_at              | SUCNR1      | SUCCINATE RECEPTOR 1                                                  | 2.7         |
| 209147_s_at            | PPAP2A      | PHOSPHATIDIC ACID PHOSPHATASE TYPE 2A                                 | 1.7         |
| 229383_at              | MARCH--1    | MEMBRANE-ASSOCIATED RING FINGER (C3HC4) 1                             | 2.3         |
| 214467_at              | GPR65       | G PROTEIN-COUPLED RECEPTOR 65                                         | 2.2         |
| 57588_at               | SLC24A3     | SOLUTE CARRIER FAMILY 24 (SODIUM/POTASSIUM/CALCIUM EXCHANGER), MEMBER | 2.1         |
| 212014_x_at            | CD44        | CD44 ANTIGEN (INDIAN BLOOD GROUP)                                     | -1.8        |
| 219666_at, 223922_x_at | MS4A6A      | CD20-LIKE PRECURSOR                                                   | 2.9         |
| 242108_at              | TPCN1       | TWO PORE SEGMENT CHANNEL 1                                            | 1.7         |
|                        |             | <b>Regulation of Transcription</b>                                    |             |
| 236023_at              | CDK9        | CYCLIN-DEPENDENT KINASE 9 (CDC2-RELATED KINASE)                       | -1.8        |
| 206118_at              | STAT4       | SIGNAL TRANSDUCER AND ACTIVATOR OF TRANSCRIPTION 4                    | 1.6         |
| 209357_at              | CITED2      | CBP/P300-INTERACTING TRANSACTIVATOR                                   | 2           |
| 206240_s_at            | ZNF136      | ZINC FINGER PROTEIN 136 (CLONE PHZ-20)                                | -1.7        |
| 231085_s_at            | PCBD2       | COFACTOR OF HEPATOCYTE NUCLEAR FACTOR 1 ALPHA (TCF1) 2                | -1.9        |
| 244640_at              | LOC342892   | HYPOTHETICAL PROTEIN LOC342892                                        | 2.2         |
| 1569191_at             | ZNF737      | SIMILAR TO ZINC FINGER PROTEIN 93 (ZINC FINGER PROTEIN HTF34)         | 1.8         |
|                        |             | <b>Unclassified</b>                                                   |             |
| 244546_at              | CYCS        | CYTOCHROME C, SOMATIC                                                 | -1.6        |
| 215813_s_at            | PTGS1       | PROSTAGLANDIN-ENDOPEROXIDE SYNTHASE 1                                 | 1.9         |
| 205603_s_at            | PTGS1       | DIAPHANOUS HOMOLOG 2 (DROSOPHILA)                                     | -1.6        |
| 205756_s_at            | F8          | COAGULATION FACTOR VIII, PROCOAGULANT COMPONENT (HEMOPHILIA A)        | -1.6        |
| 217521_at              | HAL         | HISTIDINE AMMONIA-LYASE                                               | 1.7         |
| 243206_at              | CCDC45      | COILED-COIL DOMAIN CONTAINING 45                                      | -1.6        |
| 208791_at, 208792_s_at | CLU         | CLUSTERIN                                                             | 2.4         |
| 225762_x_at, 225767_at | LOC284801   | HYPOTHETICAL PROTEIN LOC284801                                        | -2.2        |
| 211734_s_at            | FCER1A      | FC FRAGMENT OF IGE, HIGH AFFINITY I, RECEPTOR FOR; ALPHA POLYPEPTIDE  | 2.5         |
| 1554348_s_at           | CDKN2AIPNL  | SIMILAR TO RIKEN CDNA A430101B06 GENE                                 | -1.6        |
| 202729_s_at            | LTBP1       | LATENT TRANSFORMING GROWTH FACTOR BETA BINDING PROTEIN 1              | 3           |
| 243918_at              | KLHL24      | KELCH-LIKE 24 (DROSOPHILA)                                            | -1.6        |
| 238715_at              | LOC400614   | HYPOTHETICAL LOC400614                                                | -1.5        |
| 211743_s_at            | PRG2        | PROTEOGLYCAN 2                                                        | 7.5         |
| 205768_s_at, 205769_at | SLC27A2     | FATTY-ACID-COENZYME A LIGASE, VERY LONG-CHAIN 1                       | 1.7         |
| 238498_at              | N/A         | CONSENSUS INCLUDES GB:AA583038                                        | -1.6        |
| 1558711_at             | FAM13A1OS   | FAMILY WITH SEQUENCE SIMILARITY 13, MEMBER A1 OPPOSITE STRAND         | -1.6        |
| 206111_at              | hCG_1998957 | MAJOR HISTOCOMPATIBILITY COMPLEX                                      | 1.8         |
| 242051_at              | N/A         | CONSENSUS INCLUDES GB:A1695695                                        | -1.8        |
| 210623_at              | LOC51035    | UNKNOWN PROTEIN LOC51035                                              | -1.6        |
| 244515_at              | PSMD7       | PROTEASOME (PROSOME, MACROPAIN) 26S SUBUNIT, NON-ATPASE, 7 (MOV34 HOM | -1.9        |
| 222557_at              | STMN3       | STATHMIN-LIKE 3                                                       | -1.5        |
| 207067_s_at            | HDC         | HISTIDINE DECARBOXYLASE                                               | 3.8         |
| 202481_at              | DHRS3       | DEHYDROGENASE/REDUCTASE (SDR FAMILY) MEMBER 3                         | 1.6         |
| 223809_at              | RG518       | REGULATOR OF G-PROTEIN SIGNALLING 18                                  | 4.4         |
| 221735_at              | WDR48       | WD REPEAT DOMAIN 48                                                   | -1.8        |
| 202149_at              | NEDD9       | NEURAL PRECURSOR CELL EXPRESSED, DEVELOPMENTALLY DOWN-REGULATED 9     | 2.2         |
